# Supplementary material
Source: MDPI journal article supplement (https://www.mdpi.com/2073-445X/10/7/726)
Supplement: s1 [file s1]

Archive with 2 entries (2 files):
- Supplementary materials_Document S1_Interview guideline.pdf
- Supplementary materials_Table S1_Results of the text analysis.pdf
