# Supplementary material
Source: MDPI journal article supplement (https://www.mdpi.com/2073-445X/10/7/726)
Supplement: s1 [file s1]

## Document S1: Interview Guideline

### *Introduction:*

Thank you very much for taking the time for this interview. These interviews are conducted as part of the research project ReGerecht, which explores new solutions for a just balance of interests between city, fringe and rural areas. During the first phase of the project, the urban-rural fringe of Schwerin, meaning the city and its direct surroundings, is used as case study region.

A central part of the project is to conduct research on land use conflicts. A thorough understanding of these conflicts is a precondition for successful cooperation in urban-rural fringes – otherwise, one searches for solutions without understanding the problem.

Furthermore, knowledge of the causes of conflicts is necessary to identify stable solutions or at least ways to handle conflicts. Therefore, I would like to ask you a few questions regarding land use conflicts.

1. First of all: Could you please briefly introduce yourself? What is your background, what are your tasks?
2. Land use conflicts – is this a term that matters to you? Do land use conflicts play a role in your daily work?

*If the term is unknown or misunderstood, explain after this question.*

3. Which land use conflicts in the urban-rural fringe of Schwerin are you aware of?
4. *If necessary:* Could you name specific examples for the conflicts you just mentioned?
5. Could you localise these conflicts / some examples of these conflicts on this map?

*If conflicts cannot be localised, note reasons.*

6. *If too many conflicts were named to talk about all in depth:*

Which of these conflicts would you see as the most important or the main conflicts?

*Repeat the following questions for each of the main conflicts, skip whichever has already been answered:*

7. What is this conflict about?
8. Which actors are relevant in this conflict?
9. Which aims and interests do these actors have?
10. Are there any alliances between these actors?
11. Are all conflict parties aware of the conflict?
12. How has the conflict proceeded so far? What was the trigger?
13. Has conflict action (complaints, protests, legal steps, etc.) occurred, and if so, what?
14. On a scale from 1 to 10, where 1 is the mildest conflict that one can still perceive and 10 is a completely escalated conflict, how would you rate this conflict?
15. What are in your opinion the causes of the conflict?
16. Are there any procedures to deal with such conflicts, and if so, which?
17. *If yes:* Which effects do these procedures have? Do they contribute to solve the conflict? In how far (not)?
18. Do you see any other possible solutions? What would be the best solution in your opinion?

*General question:*

19. Can you think of any other actors that we should ask regarding this topic?

We have now reached the end of the interview. Once again thank you very much for taking the time.
