# Supplementary material
Source: MDPI journal article supplement (https://www.mdpi.com/2073-445X/10/7/726)
Supplement: s1 [file s1]

**Table S1: Results of the text analysis**

List of the different identified conflicts with conflict lines and urban-fringe alliances

*Abbreviations used in table:*

City: City of Schwerin

Fringe: Official fringe of Schwerin

Rural: Communities outside the official fringe, but within the two administrative districts that border the city of Schwerin

MWP: Mecklenburg-Western Pomerania

FRG: Federal Republic of Germany

EU: European Union

CityX: City other than Schwerin

FringeX: Fringe belonging to a city other than Schwerin

|    | <b>Conflict</b>                                                                | <b>Conflict lines</b>                  | <b>Urban-fringe alliance</b> |
|----|--------------------------------------------------------------------------------|----------------------------------------|------------------------------|
| 1  | Fish ladder and weir                                                           | Fringe-Fringe                          | No                           |
| 2  | Agricultural activities in conflict with new residential neighbourhood         | CityX-Rural                            | No                           |
| 3  | Photovoltaics block space for new industrial construction                      | CityX-CityX                            | No                           |
| 4  | Transformer station                                                            | Fringe-Unclear                         | No                           |
| 5  | Rebuilding of freeway access                                                   | Fringe-City <i>and</i> fringe          | No                           |
| 6  | Collaborative housing project                                                  | City-City                              | No                           |
| 7  | Outlet center                                                                  | City-CityX                             | No                           |
| 8  | Brine pool                                                                     | City-Fringe                            | No                           |
| 9  | Dock construction                                                              | City-Fringe                            | No                           |
| 10 | Removing ruins of failed investment                                            | Fringe-Unclear                         | No                           |
| 11 | Right of dam                                                                   | Fringe-Fringe                          | No                           |
| 12 | Illegal ploughing of kettle holes                                              | Fringe-FRG                             | No                           |
| 13 | Access road through area of amphibian migration                                | City-City                              | No                           |
| 14 | Constraints from drinking water protection zones and nature conservation areas | Fringe-Fringe                          | No                           |
| 15 | Establishment of primeval forest                                               | Fringe-City <i>and</i> fringe          | No                           |
| 16 | Contractual nature conservation agreement disregarded                          | City-Fringe                            | No                           |
| 17 | High land value restricts development of new residential areas                 | Fringe-Fringe                          | No                           |
| 18 | Agricultural transports damage communal road                                   | Fringe-Fringe                          | No                           |
| 19 | Drainage                                                                       | Fringe-Fringe                          | No                           |
| 20 | Jetty construction failed                                                      | Fringe-Fringe                          | No                           |
| 21 | Overcrowded bicycle lane                                                       | City-City, City-City <i>and</i> fringe | No                           |

|    |                                                                                                                                                                                       |                                                                            |     |
|----|---------------------------------------------------------------------------------------------------------------------------------------------------------------------------------------|----------------------------------------------------------------------------|-----|
| 22 | Unequal distribution of recreational use of Schwerin lakes                                                                                                                            | City-Fringe                                                                | No  |
| 23 | Contradiction between goals regarding species conservation, environmental conservation, compensation areas, renewable energy, industrial production, and reduction of sealed surfaces | FRG-FRG                                                                    | No  |
| 24 | Fresh air corridor in conflict with planned construction                                                                                                                              | City-City                                                                  | No  |
| 25 | Power line near settled area                                                                                                                                                          | Fringe-City, Fringe-Fringe, Fringe-MWP                                     | Yes |
| 26 | Development of (tourist) infrastructure                                                                                                                                               | City-City, City-Fringe                                                     | Yes |
| 27 | Water body conservation measures in conflict with agriculture                                                                                                                         | City <i>and</i> fringe-Fringe, City <i>and</i> fringe-Rural, Fringe-Fringe | No  |
| 28 | Bike lanes obstruct water body conservation measures                                                                                                                                  | CityX <i>and</i> fringeX-FringeX, CityX <i>and</i> fringeX-Rural           | No  |
| 29 | Land use competition between agriculture, tourism, industry and residential uses                                                                                                      | Rural-Rural                                                                | No  |
| 30 | Industrial park                                                                                                                                                                       | Rural-Rural, CityX-Rural                                                   | No  |
| 31 | Extension of boatyard                                                                                                                                                                 | CityX-CityX                                                                | No  |
| 32 | Reactivating of train line                                                                                                                                                            | Fringe-Fringe, Rural-Rural, MWP-MWP                                        | No  |
| 33 | Loss of agricultural land due to construction (in general)                                                                                                                            | Fringe-Fringe, Rural-Rural, City-Fringe                                    | Yes |
| 34 | Loss of agricultural land due to construction, here for freeway                                                                                                                       | Fringe-City <i>and</i> fringe, Fringe-MWP                                  | No  |
| 35 | Loss of agricultural land due to construction, here for train line and highway                                                                                                        | City-Unclear                                                               | No  |
| 36 | Loss of agricultural land due to construction, here for residential area (case 1)                                                                                                     | City-City                                                                  | No  |
| 37 | Loss of agricultural land due to construction, here for residential area (case 2)                                                                                                     | Fringe-Fringe                                                              | No  |
| 38 | Loss of agricultural land due to construction, here for residential area (case 3)                                                                                                     | Fringe-Fringe                                                              | No  |
| 39 | Loss of agricultural land due to construction of photovoltaics                                                                                                                        | Fringe-Unclear                                                             | No  |
| 40 | Loss of agricultural land due to construction, here for freeway                                                                                                                       | Fringe-Fringe, Fringe-City                                                 | Yes |
| 41 | Loss of agricultural land due to construction, here for residential area (case 4)                                                                                                     | Rural-CityX                                                                | No  |
| 42 | Loss of agricultural land due to construction, here for industrial area                                                                                                               | Rural-Rural                                                                | No  |

|    |                                                                                                        |                                                                           |    |
|----|--------------------------------------------------------------------------------------------------------|---------------------------------------------------------------------------|----|
| 43 | Recreational use of Schwerin lakes versus nature conservation (in general)                             | City <i>and</i> fringe-City <i>and</i> fringe                             | No |
| 44 | Recreational use of Schwerin lakes versus nature conservation, here ban on navigation in specific area | City <i>and</i> fringe-City <i>and</i> fringe, City <i>and</i> fringe-FRG | No |
| 45 | Recreational use of Schwerin lakes versus nature conservation, here to protect wild geese              | City <i>and</i> fringe-City <i>and</i> fringe                             | No |
| 46 | Recreational use of Schwerin lakes versus nature conservation, here berths in nature conservation area | City <i>and</i> fringe-City <i>and</i> fringe                             | No |
| 47 | Recreational use of Schwerin lakes versus nature conservation, here breeding birds                     | City <i>and</i> fringe-City <i>and</i> fringe                             | No |
| 48 | Dock built in bird habitat                                                                             | City <i>and</i> fringe-City                                               | No |
| 49 | Conflicts around finding compensation areas (in general)                                               | City-Fringe, City-Rural, Fringe-Fringe, Rural-Rural, City-City            | No |
| 50 | Conflict around finding compensation areas (case 1)                                                    | City-Fringe                                                               | No |
| 51 | Conflict around finding compensation areas (case 2)                                                    | Fringe-FRG                                                                | No |
| 52 | Conflict between compensation area and agriculture (case 1)                                            | City-Fringe                                                               | No |
| 53 | Conflict between compensation area and agriculture (case 2)                                            | Fringe-Unclear                                                            | No |
| 54 | Conflict around finding compensation areas (case 3)                                                    | Rural-FRG                                                                 | No |
| 55 | Conflict between industrial construction and species conservation                                      | City-City, City-Fringe                                                    | No |
| 56 | Gravel mining                                                                                          | Fringe-Fringe, Fringe-MWP                                                 | No |
| 57 | Design of public transport space                                                                       | Fringe-Fringe                                                             | No |
| 58 | Residential development in fringe (in general)                                                         | City-Fringe                                                               | No |
| 59 | Residential development regulation (case 1)                                                            | City-Fringe                                                               | No |
| 60 | Residential development regulation (case 2)                                                            | City-Fringe, Fringe-City <i>and</i> fringe                                | No |
| 61 | Residential development regulation (case 3)                                                            | City-Fringe                                                               | No |
| 62 | Residential development regulation (case 4)                                                            | City-Fringe                                                               | No |
| 63 | Residential development regulation (case 5)                                                            | City-Fringe                                                               | No |
| 64 | Residential development regulation (case 6)                                                            | City-Fringe                                                               | No |
| 65 | Residential development regulation (case 7)                                                            | City-Fringe                                                               | No |
| 66 | Residential development regulation (case 8)                                                            | City-Fringe                                                               | No |

|    |                                                                                                      |                                              |     |
|----|------------------------------------------------------------------------------------------------------|----------------------------------------------|-----|
| 67 | Residential development regulation (case 9)                                                          | City-Fringe                                  | No  |
| 68 | Residential development regulation (case 10)                                                         | City-Fringe                                  | No  |
| 69 | Residential development regulation (case 11)                                                         | City-Fringe                                  | No  |
| 70 | Residential development regulation (case 12)                                                         | City-Fringe                                  | No  |
| 71 | Competition for leased land                                                                          | Fringe-Fringe, Rural-Rural                   | No  |
| 72 | Competition for agricultural land                                                                    | City-City, Fringe-City                       | No  |
| 73 | Loss of agricultural diversity                                                                       | Fringe-Fringe, Rural-Rural                   | No  |
| 74 | Contradiction between nature conservation and conditions for EU agricultural subsidies               | Fringe-EU, Rural-EU, City-Fringe             | No  |
| 75 | Competition for land between agriculture and Landgesellschaft MV                                     | Fringe-Fringe, Rural-Rural                   | No  |
| 76 | Land consumption by renewable energy infrastructure                                                  | Fringe-FRG, Rural-FRG                        | No  |
| 77 | Conflict around construction of horseback riding, hiking, and cycling trails                         | Fringe-Fringe, City-Fringe, City-City        | Yes |
| 78 | Construction of bicycle lane blocked                                                                 | Fringe-Fringe, Fringe-City <i>and</i> fringe | No  |
| 79 | Construction of bicycle lane in nature conservation area                                             | Fringe-Fringe, Fringe-City <i>and</i> fringe | No  |
| 80 | Change of bicycle lane course                                                                        | City-City, City-City <i>and</i> fringe       | No  |
| 81 | Nature conservation areas obstruct development of residential areas                                  | Fringe-Fringe                                | No  |
| 82 | Lack of communal land                                                                                | Fringe-Fringe                                | No  |
| 83 | Failed implementation of climate protection concepts                                                 | Fringe-Fringe, Fringe-MWP, Fringe-City       | No  |
| 84 | Conflict about wind turbines (case 1)                                                                | Fringe-MWP, Fringe-FRG                       | No  |
| 85 | Conflict about wind turbines (case 2)                                                                | Unclear-Unclear                              | No  |
| 86 | Conflict about wind turbines (case 3)                                                                | Fringe-Unclear                               | No  |
| 87 | Conflict about wind turbines (case 4)                                                                | Fringe-Unclear                               | No  |
| 88 | Conflict about wind turbines (case 5)                                                                | Fringe-Fringe                                | No  |
| 89 | Extension of feedlots                                                                                | Fringe-Fringe                                | No  |
| 90 | Challenges from commuter flows                                                                       | City-Fringe                                  | No  |
| 91 | Lack of parking lots                                                                                 | City-Fringe, City-City, City-Rural           | Yes |
| 92 | Lack of understanding for agriculture among citizens                                                 | City-Fringe, Fringe-Fringe                   | Yes |
| 93 | Construction of seniors' infrastructure                                                              | City-Fringe                                  | No  |
| 94 | Construction of intergenerational project                                                            | City-Fringe                                  | No  |
| 95 | Conflict between reduction of sealed surfaces and demand for residential areas in rural environments | City-Fringe, City-City                       | No  |
| 96 | Afforestation of agricultural land                                                                   | Unclear-Unclear                              | No  |

|     |                                                             |                                                    |     |
|-----|-------------------------------------------------------------|----------------------------------------------------|-----|
| 97  | Construction of biogas plants                               | Fringe-Fringe, City-Fringe                         | No  |
| 98  | Problems with existing biogas plants and composters         | Fringe-Fringe                                      | No  |
| 99  | Conflict about public services and retail                   | City-Fringe                                        | No  |
| 100 | Location of vocational college                              | City-Fringe                                        | No  |
| 101 | Nutrient inputs into lake that is low in nutrients (case 1) | City-Fringe, Fringe-Fringe, City-City              | Yes |
| 102 | Nutrient inputs into lake that is low in nutrients (case 2) | Fringe-Fringe                                      | No  |
| 103 | Visitors disregard rules of forest use                      | City-City, City-Fringe                             | Yes |
| 104 | Conflict between forestry and nature conservation           | City-City, City-Fringe, Fringe-Fringe              | Yes |
| 105 | Lack of appreciation for forestry among citizens            | City-City, City-Fringe, Fringe-Fringe              | Yes |
| 106 | Littering in forest (case 1)                                | Fringe-Fringe, City-Fringe                         | Yes |
| 107 | Littering in forest (case 2)                                | City-City                                          | No  |
| 108 | Motocross bikes in forest                                   | Fringe-Fringe, City-Fringe                         | Yes |
| 109 | Unleashed dogs in forest                                    | Fringe-Fringe, City-Fringe                         | Yes |
| 110 | Conflict between forestry and horseback riding              | Fringe-Fringe                                      | No  |
| 111 | Conflict about desired water level in lake                  | Fringe-Fringe                                      | No  |
| 112 | Photovoltaics                                               | Fringe-Fringe                                      | No  |
| 113 | Planned facility to raise laying hens                       | Fringe-Fringe, Fringe-MWP, Fringe-City, Fringe-FRG | Yes |
| 114 | Planned facility for dairy cows                             | Rural-Rural, CityX-Rural                           | No  |
| 115 | Expansion of highway (case 1)                               | City-City                                          | No  |
| 116 | Expansion of highway (case 2)                               | City-City                                          | No  |
| 117 | Measures for heavy rain protection                          | City-City                                          | No  |
| 118 | Ecological priority areas                                   | Fringe-EU                                          | No  |
| 119 | Conflict about wind turbines                                | Fringe-Unclear                                     | No  |
| 120 | Loss of mixed residential / trade areas                     | City-City                                          | No  |
| 121 | Loss of agricultural land due to afforestation              | Fringe-Fringe                                      | No  |
| 122 | Lack of understanding for agriculture among new residents   | Fringe-Fringe                                      | No  |
| 123 | Short terms of lease for agricultural land                  | City-Fringe                                        | No  |
| 124 | Trees overgrow agricultural land                            | City-Fringe                                        | No  |
